# Supplementary material for: The impact of differently structured starch gels on the gastrointestinal fate of a curcumin-containing nanoemulsion
Source: Royal Society of Chemistry journal article supplement (doi:10.1039/d3fo01566a), 2023-01-01
Supplement: d3fo01566a1.pdf [file d3fo01566a1.pdf]

## SUPPLEMENTARY DATA

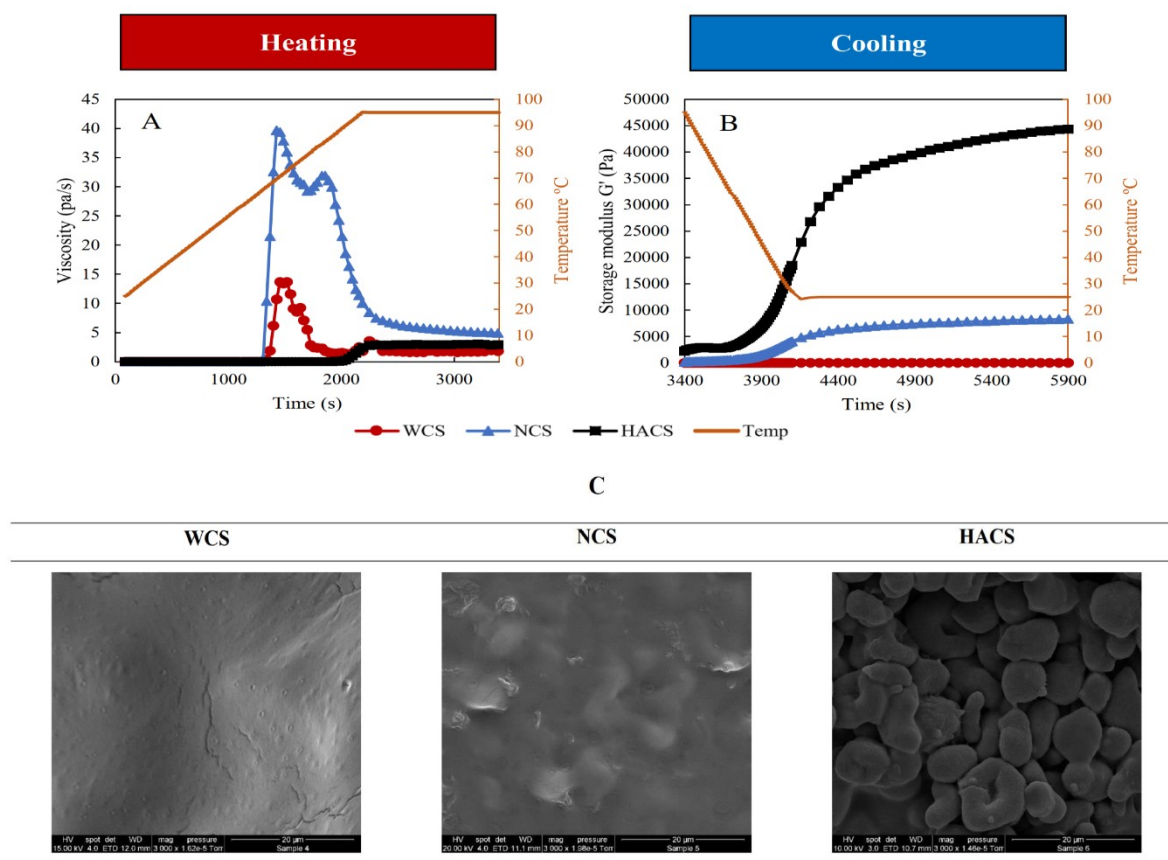

**Supplemental Fig. S1** (A, B) Pasting profiles of different corn starch solutions without curcumin nanoemulsion (CNE). (A) Development of viscosity (Pa.s) during heating (25–95 °C) and (B) change in storage modulus ( $G'$ ) during cooling (95–25 °C) of the starch gels. (C) Microstructures of starch gels without CNE using scanning electron microscopy at 3000x magnification. WCS, waxy corn starch; NCS, normal corn starch; HACS, high amylose corn starch.

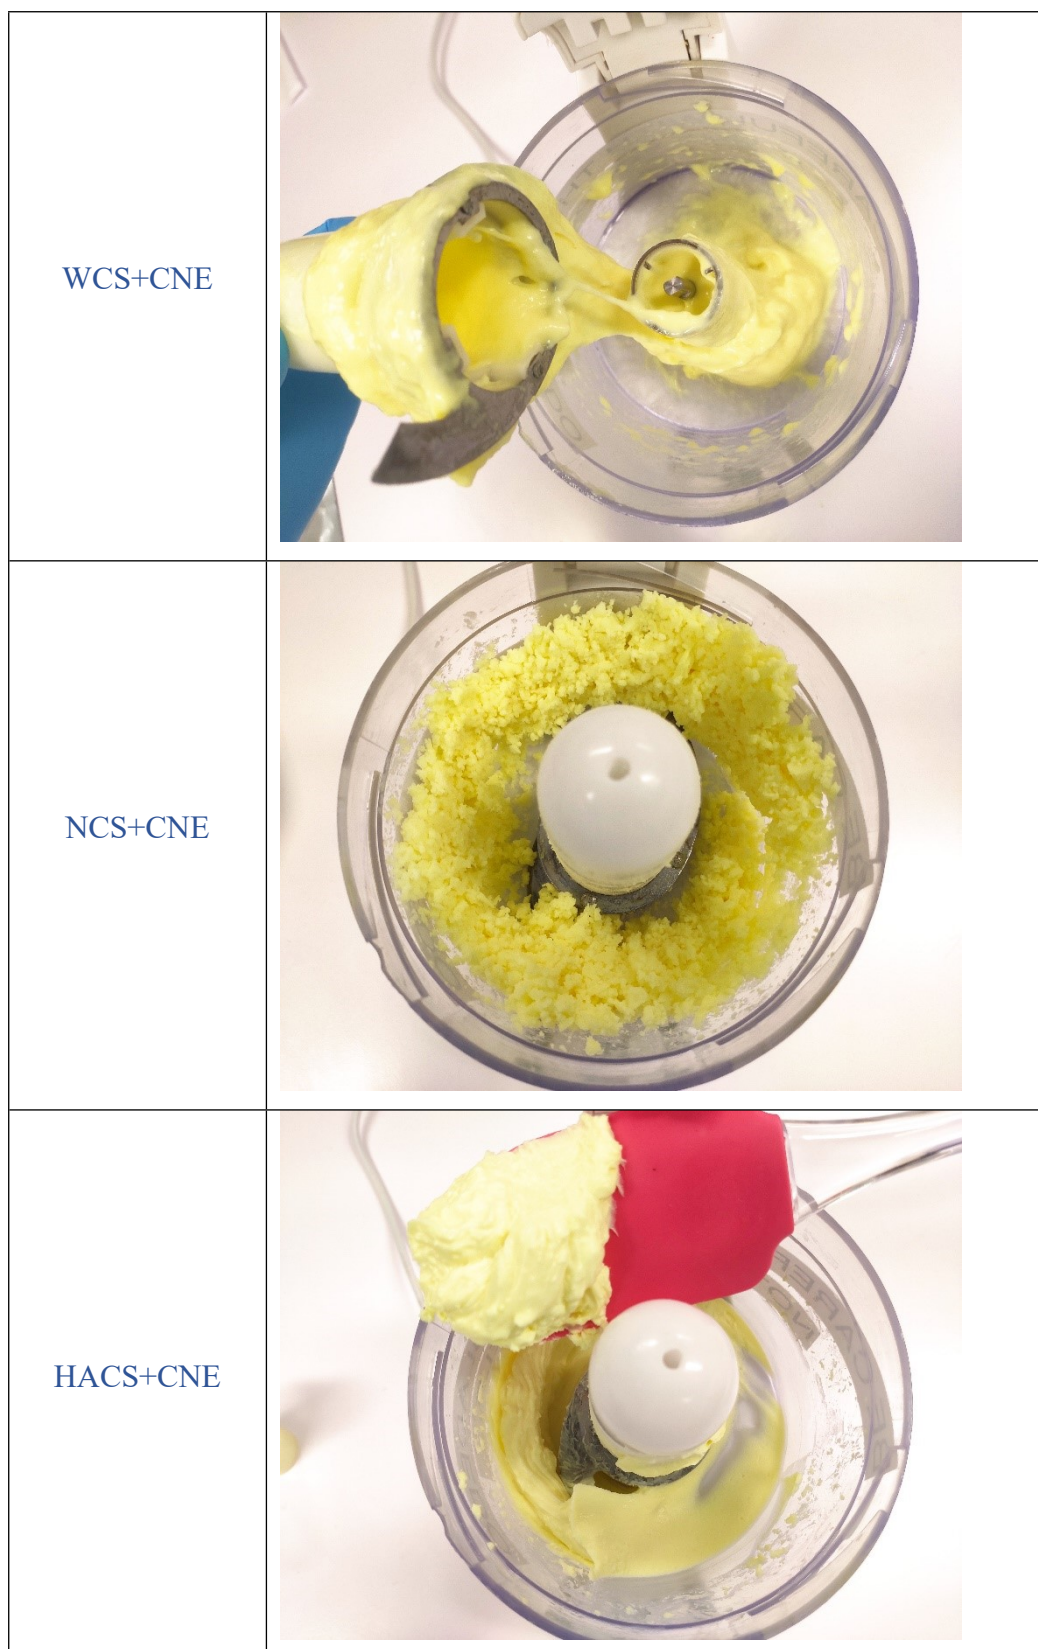

**Supplemental Fig. S2.** Visual appearance of the starch gel structures after grinding.
